# Supplementary material for: Screening and intervention for intimate partner violence at trauma centers and emergency departments: an evidence-based systematic review from the Eastern Association for the Surgery of Trauma
Source: HighWire-hosted journal article supplement (doi:10.1136/tsaco-2022-001041), 2023-03-01
Supplement: tsaco-2022-001041supp001_data_supplement.pdf [file tsaco-2022-001041supp001_data_supplement.pdf]

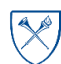

## Database Search Documentation for Systematic Reviews

|                                                     |                                                                                                                                                                                                                                                                                                                               |
|-----------------------------------------------------|-------------------------------------------------------------------------------------------------------------------------------------------------------------------------------------------------------------------------------------------------------------------------------------------------------------------------------|
| <b>INFORMATIONISTS</b>                              | <p>Kathleen Fox, Clinical Informationist<br/>Woodruff Health Sciences Center Library, Emory University</p> <p>Emily Lawson, Head of Clinical Informationist Services,<br/>Woodruff Health Sciences Center Library, Emory University</p>                                                                                       |
| <b>PI, RESEARCH TEAM MEMBERS AND INSTITUTION(S)</b> | <p>Dr. Amanda Teichman, Robert Wood Johnson, NJ<br/>Assistant Professor of Surgery, Division of Acute Care Surgery<br/>Rutgers Robert Wood Johnson Medical School</p> <p>Dr. Hassan Mashbari, Harvard/Mass General Hospital<br/>Assistant Professor in Surgery, Department of Surgery,<br/>Jazan University, Saudi Arabia</p> |
| <b>DATABASES SEARCHED</b>                           | <p>CINAHL (EBSCO)<br/>         PsycInfo (EBSCO)<br/>         Medline (PubMed)<br/>         Scopus (Elsevier)<br/>         Violence &amp; Abuse Abstracts (EBSCO)<br/>         Web of Science (Clarivate Analytics)<br/>         Sociological Abstracts<br/>         Embase</p>                                                |
| <b>NUMBER OF RESULTS</b>                            | <p>12,324 prior to de-duplication<br/>Date searched 03/16/2022</p> <p>4,559 duplicate citations identified.</p> <p><b>7,765 citations for review</b></p>                                                                                                                                                                      |
| <b>HOW/WHEN WERE RESULTS SENT TO REQUESTOR</b>      | <p>Covidence project created containing 6,494 citations<br/>Invite sent to Research Team</p> <p>ENL .text file sent 3/16/22<br/>Compressed ENL tbd</p>                                                                                                                                                                        |
| <b>SERVICE TIER AGREED UPON</b>                     | 2                                                                                                                                                                                                                                                                                                                             |

### REVIEW QUESTION

*Provide the full review question in sentence format; then break up the question according to the PICO(TT) framework (or other frameworks if appropriate).*

The purpose of this study is to provide an evidence-based review of screening practices for intimate partner violence in trauma victims receiving care in Emergency Departments and Trauma Centers in the US.

## Final Search Statements

## PubMed

| # | Search                                                                                                                                                                                                                                                                                                                                                                                                                                       |
|---|----------------------------------------------------------------------------------------------------------------------------------------------------------------------------------------------------------------------------------------------------------------------------------------------------------------------------------------------------------------------------------------------------------------------------------------------|
| 1 | "Trauma Centers"[Mesh] OR "Emergency Nursing"[Mesh] OR "Emergency Treatment"[Mesh] OR "Emergency Medicine"[Mesh] OR "Emergency Service, Hospital"[Mesh] OR "Emergency Medical Services"[Mesh:NoExp] OR Triage[Mesh] OR triage[tw] OR ((emergenc*[tw] OR emergicent*[tw] OR casualty[tw] OR trauma[tw]) AND (center*[tw] OR centre*[tw] OR room*[tw] OR department*[tw] OR ward[tw] OR wards[tw] OR unit*[tw] OR visit*[tw]))                 |
| 2 | (domestic[tw] or partner*[tw] or spouse*[tw] or spousal[tw] or wife*[tw] or wives[tw] or husband*[tw] OR dating[tw]) AND (violence[tw] or abuse[tw] or injur*[tw] or wound*[tw] or battered[tw] or traumatic[tw] OR "gender based violence"[tw] OR "Domestic Violence"[MeSH:NoExp] OR "Intimate Partner Violence"[MeSH Terms] OR "Spouse Abuse"[Mesh] OR "Battered Women"[Mesh])                                                             |
| 3 | "Surveys and Questionnaires"[Mesh] OR "Risk Assessment"[MeSH] OR "Mass Screening"[MeSH] OR "Sensitivity and Specificity"[Mesh] OR "Epidemiology"[Mesh] OR screen*[tw] OR assess*[tw] OR detect*[tw] OR recog*[tw] OR measure*[tw] OR question*[tw] OR survey*[tw] OR checklist*[tw] OR identif*[tw] OR tool*[tw] OR scale*[tw] OR rate*[tw] OR rating*[tw] OR scan*[tw] OR instrument*[tw] OR sensitiv* OR specific*[tw] OR epidemiolog*[tw] |
| 4 | #1 AND #2 AND #3                                                                                                                                                                                                                                                                                                                                                                                                                             |
| 5 | Filters: English only, 2000-2022                                                                                                                                                                                                                                                                                                                                                                                                             |

## CINAHL

| # | Search                                                                                                                                                                                                                                                                                                                                        |
|---|-----------------------------------------------------------------------------------------------------------------------------------------------------------------------------------------------------------------------------------------------------------------------------------------------------------------------------------------------|
| 1 | SU "Trauma Centers" OR "Emergency Nursing" OR "Emergency Treatment" OR "Emergency Medicine" OR "Hospital Emergency Service" OR "Emergency Medical Services" OR Triage OR triage OR ((emergenc* OR emergicent* OR casualty OR trauma) AND (center* OR centre* OR room* OR department* OR ward OR wards OR unit* OR visit*))                    |
| 2 | SU (domestic or partner* or spouse* or spousal or wife* or wives or husband* OR dating) AND (violence or abuse or injur* or wound* or battered or traumatic OR "gender based violence" OR "Domestic Violence" OR "Intimate Partner Violence" OR "Spouse Abuse" OR "Battered Women")                                                           |
| 3 | SU "Surveys and Questionnaires" OR "Risk Assessment" OR "Mass Screening" OR "Sensitivity and Specificity" OR "Epidemiology" OR screen* OR assess* OR detect* OR recog* OR measure* OR question* OR survey* OR checklist* OR identif* OR tool* OR scale* OR rate* OR rating* OR scan* OR instrument* OR sensitiv* OR specific* OR epidemiolog* |

|   |                                                                               |
|---|-------------------------------------------------------------------------------|
| 4 | S1 AND S2 AND S3                                                              |
| 5 | Limiters - Published Date: 20000101-20221231<br>Narrow by Language: - english |

**PsycInfo**

| # | Search                                                                                                                                                                                                                                                                                                                                        |
|---|-----------------------------------------------------------------------------------------------------------------------------------------------------------------------------------------------------------------------------------------------------------------------------------------------------------------------------------------------|
| 1 | SU "Trauma Centers" OR "Emergency Nursing" OR "Emergency Treatment" OR "Emergency Medicine" OR "Hospital Emergency Service" OR "Emergency Medical Services" OR Triage OR triage OR ((emergenc* OR emergent* OR casualty OR trauma) AND (center* OR centre* OR room* OR department* OR ward OR wards OR unit* OR visit*))                      |
| 2 | SU (domestic or partner* or spouse* or spousal or wife* or wives or husband* OR dating) AND (violence or abuse or injur* or wound* or battered or traumatic OR "gender based violence" OR "Domestic Violence" OR "Intimate Partner Violence" OR "Spouse Abuse" OR "Battered Women")                                                           |
| 3 | SU "Surveys and Questionnaires" OR "Risk Assessment" OR "Mass Screening" OR "Sensitivity and Specificity" OR "Epidemiology" OR screen* OR assess* OR detect* OR recog* OR measure* OR question* OR survey* OR checklist* OR identif* OR tool* OR scale* OR rate* OR rating* OR scan* OR instrument* OR sensitiv* OR specific* OR epidemiolog* |
| 4 | S1 AND S2 AND S3                                                                                                                                                                                                                                                                                                                              |
| 5 | Limiters - Published Date: 20000101-20221231<br>Narrow by Language: - english                                                                                                                                                                                                                                                                 |

**Violence & Abuse Abstracts**

| #  | Search                                                                                                                                                                                                                                                                                                                                        |
|----|-----------------------------------------------------------------------------------------------------------------------------------------------------------------------------------------------------------------------------------------------------------------------------------------------------------------------------------------------|
| S1 | SU "Trauma Centers" OR "Emergency Nursing" OR "Emergency Treatment" OR "Emergency Medicine" OR "Hospital Emergency Service" OR "Emergency Medical Services" OR Triage OR triage OR ((emergenc* OR emergent* OR casualty OR trauma) AND (center* OR centre* OR room* OR department* OR ward OR wards OR unit* OR visit*))                      |
| S2 | SU (domestic or partner* or spouse* or spousal or wife* or wives or husband* OR dating) AND (violence or abuse or injur* or wound* or battered or traumatic OR "gender based violence" OR "Domestic Violence" OR "Intimate Partner Violence" OR "Spouse Abuse" OR "Battered Women")                                                           |
| S3 | SU "Surveys and Questionnaires" OR "Risk Assessment" OR "Mass Screening" OR "Sensitivity and Specificity" OR "Epidemiology" OR screen* OR assess* OR detect* OR recog* OR measure* OR question* OR survey* OR checklist* OR identif* OR tool* OR scale* OR rate* OR rating* OR scan* OR instrument* OR sensitiv* OR specific* OR epidemiolog* |

|           |                                                                               |
|-----------|-------------------------------------------------------------------------------|
| <b>S4</b> | S1 AND S2 AND S3                                                              |
| <b>S5</b> | Limiters - Published Date: 20000101-20221231<br>Narrow by Language: - english |

### Scopus

|          |                                                                                                                                                                                                                                                                                                                                                                                                                                                                                                                                                                                                                                                                                                                                                                                                                                                                                                                                                                                                                                                                                                                                                                                                                                                                                                                                                                                                  |
|----------|--------------------------------------------------------------------------------------------------------------------------------------------------------------------------------------------------------------------------------------------------------------------------------------------------------------------------------------------------------------------------------------------------------------------------------------------------------------------------------------------------------------------------------------------------------------------------------------------------------------------------------------------------------------------------------------------------------------------------------------------------------------------------------------------------------------------------------------------------------------------------------------------------------------------------------------------------------------------------------------------------------------------------------------------------------------------------------------------------------------------------------------------------------------------------------------------------------------------------------------------------------------------------------------------------------------------------------------------------------------------------------------------------|
| <b>1</b> | TITLE-ABS-KEY ( ( emergency OR emergicent OR casualty OR trauma ) AND ( center OR centre OR room OR department OR ward OR wards OR unit OR visit ) )                                                                                                                                                                                                                                                                                                                                                                                                                                                                                                                                                                                                                                                                                                                                                                                                                                                                                                                                                                                                                                                                                                                                                                                                                                             |
| <b>2</b> | TITLE-ABS-KEY ( ( domestic OR partner OR spouse OR spousal OR wife OR wives OR husband OR dating ) AND ( violence OR abuse OR injury OR wound OR battered OR traumatic OR {gender based violence} ) )                                                                                                                                                                                                                                                                                                                                                                                                                                                                                                                                                                                                                                                                                                                                                                                                                                                                                                                                                                                                                                                                                                                                                                                            |
| <b>3</b> | ( TITLE-ABS-KEY ( ( emergency OR emergicent OR casualty OR trauma ) AND ( center OR centre OR room OR department OR ward OR wards OR unit OR visit ) ) ) AND ( TITLE-ABS-KEY ( ( domestic OR partner OR spouse OR spousal OR wife OR wives OR husband OR dating ) AND ( violence OR abuse OR injury OR wound OR battered OR traumatic OR {gender based violence} ) ) ) AND ( TITLE-ABS-KEY ( screen OR assess OR detect OR recognize OR measure OR question OR survey OR checklist OR identify OR tool OR scale OR rate OR rating OR scan OR instrument OR sensitive OR specific OR epidemiology ) ) )                                                                                                                                                                                                                                                                                                                                                                                                                                                                                                                                                                                                                                                                                                                                                                                           |
| <b>4</b> | ( TITLE-ABS-KEY ( ( emergency OR emergicent OR casualty OR trauma ) AND ( center OR centre OR room OR department OR ward OR wards OR unit OR visit ) ) ) AND ( TITLE-ABS-KEY ( ( domestic OR partner OR spouse OR spousal OR wife OR wives OR husband OR dating ) AND ( violence OR abuse OR injury OR wound OR battered OR traumatic OR {gender based violence} ) ) ) AND ( TITLE-ABS-KEY ( screen OR assess OR detect OR recognize OR measure OR question OR survey OR checklist OR identify OR tool OR scale OR rate OR rating OR scan OR instrument OR sensitive OR specific OR epidemiology ) ) ) AND ( LIMIT-TO ( PUBYEAR , 2022 ) OR LIMIT-TO ( PUBYEAR , 2021 ) OR LIMIT-TO ( PUBYEAR , 2020 ) OR LIMIT-TO ( PUBYEAR , 2019 ) OR LIMIT-TO ( PUBYEAR , 2018 ) OR LIMIT-TO ( PUBYEAR , 2017 ) OR LIMIT-TO ( PUBYEAR , 2016 ) OR LIMIT-TO ( PUBYEAR , 2015 ) OR LIMIT-TO ( PUBYEAR , 2014 ) OR LIMIT-TO ( PUBYEAR , 2013 ) OR LIMIT-TO ( PUBYEAR , 2012 ) OR LIMIT-TO ( PUBYEAR , 2011 ) OR LIMIT-TO ( PUBYEAR , 2010 ) OR LIMIT-TO ( PUBYEAR , 2009 ) OR LIMIT-TO ( PUBYEAR , 2008 ) OR LIMIT-TO ( PUBYEAR , 2007 ) OR LIMIT-TO ( PUBYEAR , 2006 ) OR LIMIT-TO ( PUBYEAR , 2005 ) OR LIMIT-TO ( PUBYEAR , 2004 ) OR LIMIT-TO ( PUBYEAR , 2003 ) OR LIMIT-TO ( PUBYEAR , 2002 ) OR LIMIT-TO ( PUBYEAR , 2001 ) OR LIMIT-TO ( PUBYEAR , 2000 ) ) AND ( LIMIT-TO ( LANGUAGE , "ENGLISH" ) ) ) |

### Web of Science

| #        | Search                                                                                                                                                                          |
|----------|---------------------------------------------------------------------------------------------------------------------------------------------------------------------------------|
| <b>1</b> | (emergency OR emergicent OR casualty OR trauma) AND (center OR centre OR room OR department OR ward OR wards OR unit OR visit)                                                  |
| <b>2</b> | (domestic OR partner OR spouse OR spousal OR wife OR wives or husband OR dating) AND (violence OR abuse OR injury OR wound OR battered OR traumatic OR "gender based violence") |

|   |                                                                                                                                                                                                                                                       |
|---|-------------------------------------------------------------------------------------------------------------------------------------------------------------------------------------------------------------------------------------------------------|
| 3 | screen OR assess OR detect OR recognize OR measure OR question OR survey OR checklist OR identify OR tool OR scale OR rate OR rating OR scan OR instrument OR sensitive OR specific OR epidemiology                                                   |
| 4 | #1 AND #2 AND #3                                                                                                                                                                                                                                      |
| 5 | #3 AND #2 AND #1 and English (Languages) and 2022 or 2021 or 2020 or 2019 or 2018 or 2017 or 2016 or 2015 or 2014 or 2013 or 2012 or 2011 or 2010 or 2009 or 2008 or 2007 or 2006 or 2005 or 2004 or 2003 or 2002 or 2001 or 2000 (Publication Years) |

**EMBASE**

('patient admission'/exp OR 'patient admission' OR 'patient readmission'/exp OR 'patient readmission' OR 'hospital admission'/exp OR 'hospital admission' OR 'hospital readmission'/exp OR 'hospital readmission' OR 'hospitalization'/exp OR 'hospitalization' OR hospitaliz\* OR admission\* OR readmission\*) AND (screen\* OR assess\* OR detect\* OR recog\* OR measure\* OR identif\* OR 'questionnaire' OR 'questionnaire'/exp OR questionnaire OR 'survey' OR 'survey'/exp OR survey OR 'checklist' OR 'checklist'/exp OR checklist OR 'surveys and questionnaires'/exp OR 'surveys and questionnaires' OR 'risk assessment'/exp OR 'risk assessment' OR 'mass screening'/exp OR 'mass screening' OR 'health survey'/exp OR 'health survey') AND ('domestic violence'/exp OR 'domestic violence' OR 'battered woman'/exp OR 'battered woman' OR 'partner violence'/exp OR 'partner violence' OR 'domestic abuse'/exp OR 'domestic abuse' OR 'spousal abuse' OR 'spouse abuse'/exp OR 'spouse abuse' OR 'intimate partner violence'/exp OR 'intimate partner violence' OR 'intimate partner abuse' OR battered OR 'violence against women'/exp OR 'violence against women') AND [english]/lim AND [2000-2021]/py

**Scopus**

(TITLE-ABS-KEY("domestic violence" OR "battered woman" OR "partner violence" OR "domestic abuse" OR "spousal abuse" OR "spouse abuse" OR "intimate partner violence" OR "intimate partner abuse" OR battered OR "violence against women")) and (TITLE-ABS-KEY(screen\* OR assess\* OR detect\* OR recog\* OR measure\* OR identif\* OR "questionnaire" OR "survey" OR "checklist" OR "surveys and questionnaires" OR "risk assessment" OR "mass screening" OR "health survey")) and (TITLE-ABS-KEY("patient admission" OR "patient readmission" OR "hospital admission" OR "hospital readmission" OR "hospitalization" OR hospitaliz\* OR admission\* OR readmission\*)) AND ( LIMIT-TO ( LANGUAGE,"English" ) ) AND ( LIMIT-TO ( PUBYEAR,2020) OR LIMIT-TO ( PUBYEAR,2019) OR LIMIT-TO ( PUBYEAR,2018) OR LIMIT-TO ( PUBYEAR,2017) OR LIMIT-TO ( PUBYEAR,2016) OR LIMIT-TO ( PUBYEAR,2015) OR LIMIT-TO ( PUBYEAR,2014) OR LIMIT-TO ( PUBYEAR,2013) OR LIMIT-TO ( PUBYEAR,2011) OR LIMIT-TO ( PUBYEAR,2010) OR LIMIT-TO ( PUBYEAR,2009) OR LIMIT-TO ( PUBYEAR,2008) OR LIMIT-TO ( PUBYEAR,2007) OR LIMIT-TO ( PUBYEAR,2006) OR LIMIT-TO ( PUBYEAR,2005) OR LIMIT-TO ( PUBYEAR,2004) OR LIMIT-TO ( PUBYEAR,2003) OR LIMIT-TO ( PUBYEAR,2002) OR LIMIT-TO ( PUBYEAR,2001) OR LIMIT-TO ( PUBYEAR,2000) )

**Sociological Abstracts**

(MAINSUBJECT.EXACT("Surveys") OR MAINSUBJECT.EXACT("Risk Assessment") OR ab((Screen\*) OR (assess\*) OR (detect\*) OR (recog\*) OR (measure\*) OR (questionnaire) OR (survey) OR (checklist) OR (identif\*))) AND (MAINSUBJECT.EXACT("Family Violence") OR (ab(intimate partner violence) OR (Domestic Violence) OR (Spouse Abuse)

OR (domestic abuse) OR (spousal abuse) OR (Intimate partner abuse) OR (battered) OR (violence against women))) AND ((MAINSUBJECT.EXACT("Hospitalization") OR MAINSUBJECT.EXACT("Admissions")) OR ab(hospitaliz\* OR admission OR admit\* OR readmission OR readmit\*))
